# Supplementary material for: CD98hc (SLC3A2) regulation of skin homeostasis wanes with age
Source: PubMed Central journal article supplement — J Exp Med. 2013 Jan 14;210(1):173–90. doi: 10.1084/jem.20121651 (PMC3549711; doi:10.1084/jem.20121651), 2013-01-14
Supplement: supp_jem.20121651_JEM_20121651_sm.pdf [file supp_jem.20121651_JEM_20121651_sm.pdf]

## SUPPLEMENTAL MATERIAL

Boulter et al., <http://www.jem.org/cgi/content/full/jem.20121657/DC1>**Table S1.** Genotyping primer list

| Primer | Sequence                         |
|--------|----------------------------------|
| A      | 5'-GATAGACGGGAGTATTAGCGAGGC-3'   |
| B      | 5'-CTCATGGTGCCTGCAGAAACGG-3'     |
| C      | 5'-GGACATGTTACGGGATCGCCAGGCG-3'  |
| D      | 5'-GCATAACCAAGTAAACAGCATTGCTG-3' |
| F      | 5'-CAGGGTTCTGTGTATGTGGGCGG-3'    |

**Table S2.** QPCR primers

| Primer   | Sequence                   |
|----------|----------------------------|
| mJag1 F  | 5'-TCTCTGACCCTGCCATAAC-3'  |
| mJag1 R  | 5'-TTGAATCCATTACCAGATCC-3' |
| mHes1F   | 5'-ACACCGGACAAACCAAAGAC-3' |
| mHes1R   | 5'-CGCCTCTTCTCCATGATAGG-3' |
| mShh F   | 5'-CAAGTACGCATGCTGGCTC-3'  |
| mShh R   | 5'-AAGGTGAGGAAGTCGCTGTA-3' |
| mPtc2 F  | 5'-GGTCCTCCGCACCTCATATC-3' |
| mPtc2 R  | 5'-GCGCAGTCTGAATCAACATC-3' |
| mGli F   | 5'-AAGCCTGAGCCTGAGTCTGT-3' |
| mGli R   | 5'-GGTCACTGGCATTGCTAAAG-3' |
| mLef1 F  | 5'-TGAGTGACGCTAAAGGAGA-3'  |
| mLef1 R  | 5'-ATAATTGTCTCGCGTGACC-3'  |
| mGAPDH F | 5'-ACCACAGTCCATGCCATCAC-3' |
| mGAPDH R | 5'-TCCACCACCCTGTTGCTGTA-3' |

**Table S3.** LC-ESI-MSMS protein identification

| Peptide number | m/z      | $\Delta m/z$ | Range     | Sequence         |
|----------------|----------|--------------|-----------|------------------|
| 1              | 532.7500 | -75.791      | 63-71     | R.SEIYGLVQR.C    |
| 2              | 599.1700 | -217.346     | 463-471   | R.LYIQTMQER.V    |
| 3              | 337.7300 | 43.158       | 572-577   | R.IGFLPK.I       |
| 4              | 584.2700 | -70.99       | 808-816   | K.VLDQVFYQR.V    |
| 5              | 550.8400 | 70.905       | 820-829   | R.EGILSPSELR.K   |
| 6              | 539.2500 | -6.734       | 950-957   | K.YTEWPPER.E     |
| 7              | 685.7500 | -76.123      | 1273-1283 | K.STQEDWQSF.SR.Y |
